# Supplementary material for: Reliable replicative lifespan determination of yeast with a single-channel microfluidic chip
Source: PubMed Central journal article supplement (PMC11657196; doi:10.1242/bio.060596), 2024-11-26
Supplement: biolopen-13-060596-s1.pdf [file biolopen-13-060596-s1.pdf]

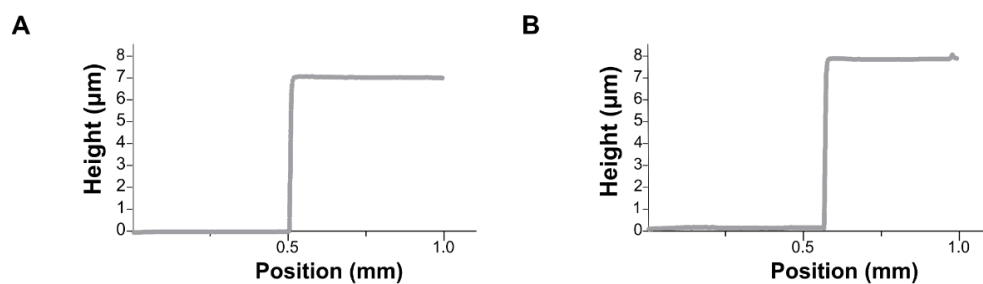

**Fig. S1. Height profile.** Mechanical profilometry step height measurements of SU-8 master molds of chip 1 (A) and chip 2 (B).

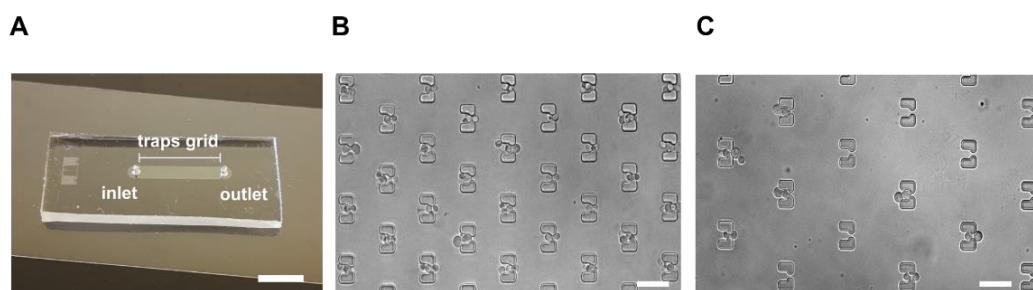

**Fig. S2. Microfabrication.** A. Microfluidic devices consist of a PDMS microchannel bonded to a # 1 glass coverslip. Bar, 1 cm. B and C Microscope bright field images of PDMS traps grid of chips 1 (B) and chip 2 (C). Bar, 20  $\mu\text{m}$ .

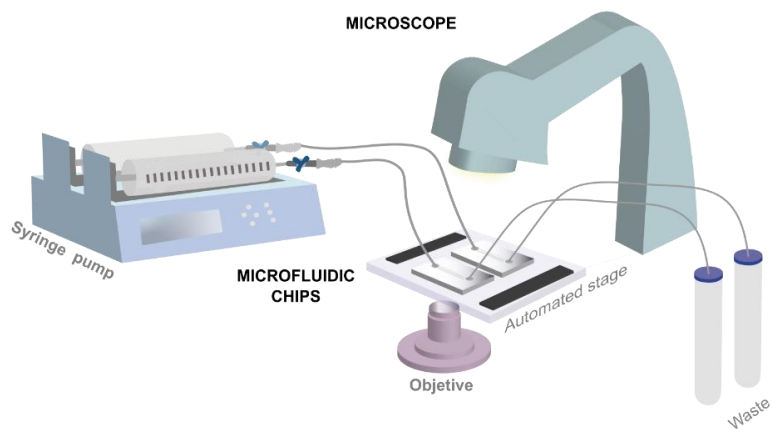

**Fig S3. Microfluidic live microscopy setup.** Schematics of the experimental setup with the microfluidic chip and a stage-automated inverted microscope.

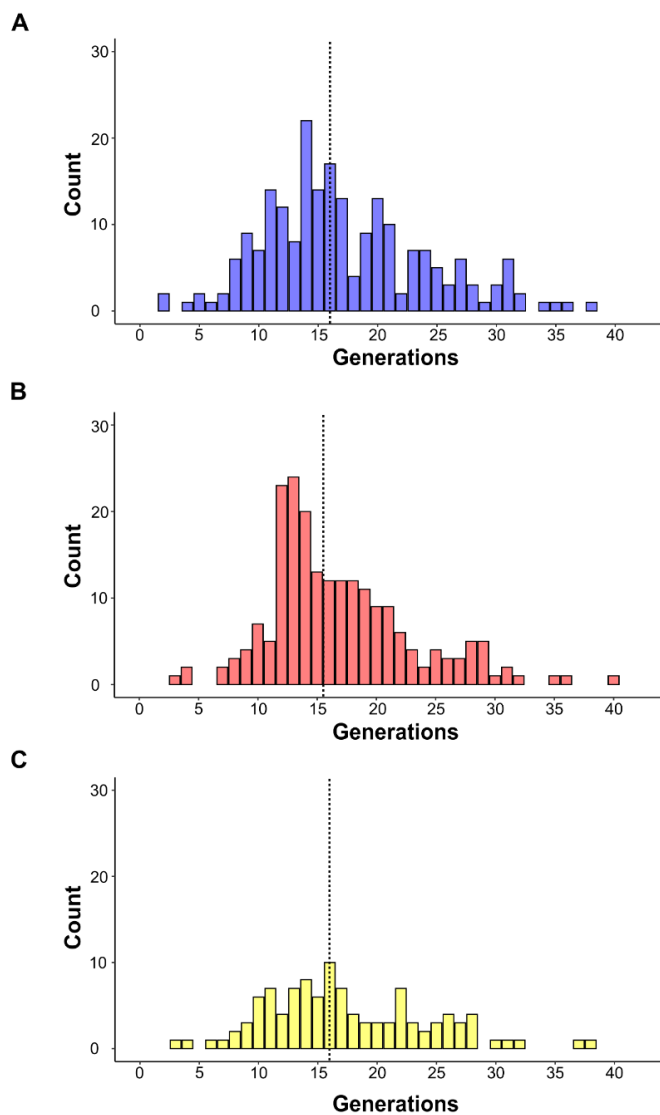

**Fig. S4. Lifespan distributions of WT cells.** Three independent experiments are shown. A. WT-1 B (n = 215 cells). WT-2 (n = 208 cells). C. WT-3 (n = 108 cells). Median lifespans are indicated by dotted lines. See Table S1.

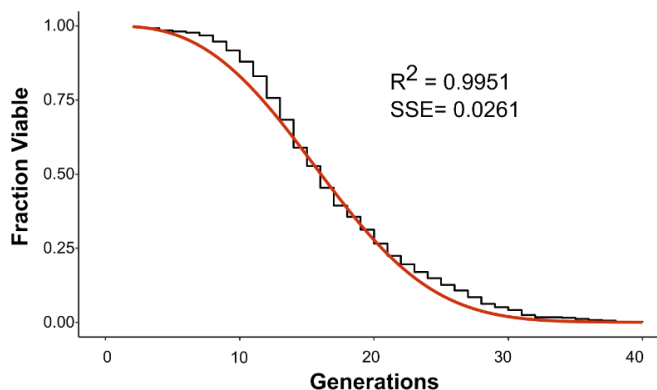

**Fig. S5. Survival curves fit the Weibull function.** Experimental cell survival curve (black,  $n = 530$ ) was fitted to a two-parameter Weibull distribution. The red line was generated using the best-fitting parameter values extracted from the fit (SSE=sum of squared errors between black points and red curve).

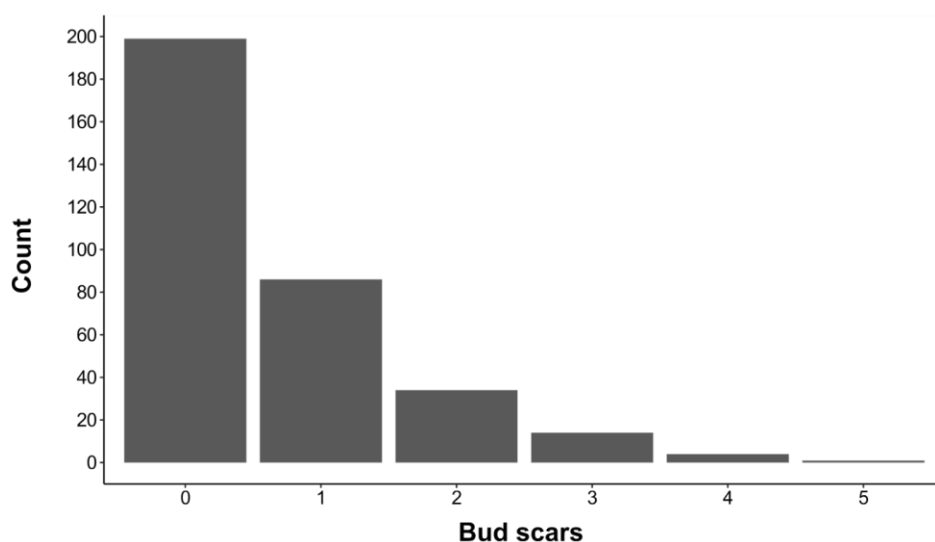

**Fig. S6. Distribution of bud scars in a population of exponentially growing yeast cells.** A mid-log phase yeast cell culture was incubated in a calcofluor white solution. Z-stacks images of the cells on a coverslip were taken and the number of bud scars per cell was quantified. See “Assessment of bud scars distribution” (item 7) in the Material and Methods section for details.  $n = 338$  cells, median=0.

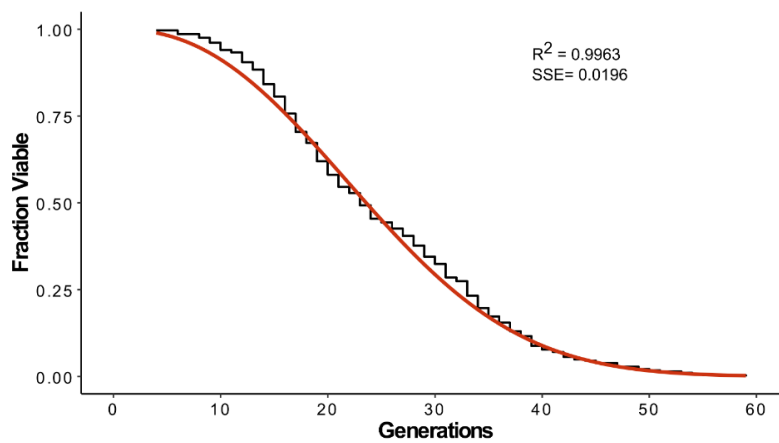

**Fig. S7. *tor1* survival curve fits the Weibull function.** Experimental cell survival curve of *tor1* mutant strain (black,  $n = 252$ ) was fitted to two-parameter Weibull distribution (red). The red line was generated using the best-fitting parameter values extracted from the fit.  $n=252$  cells from 2 independent experiments.

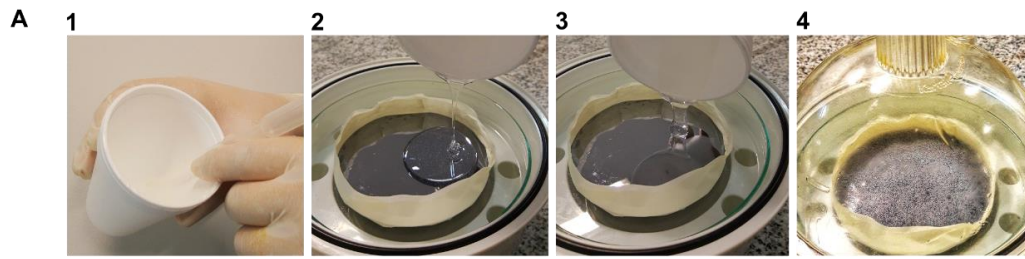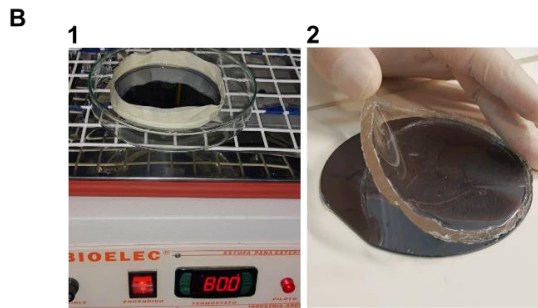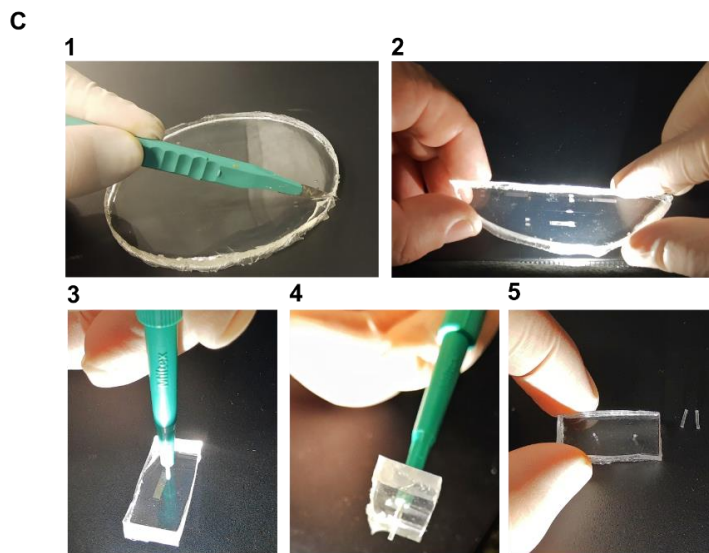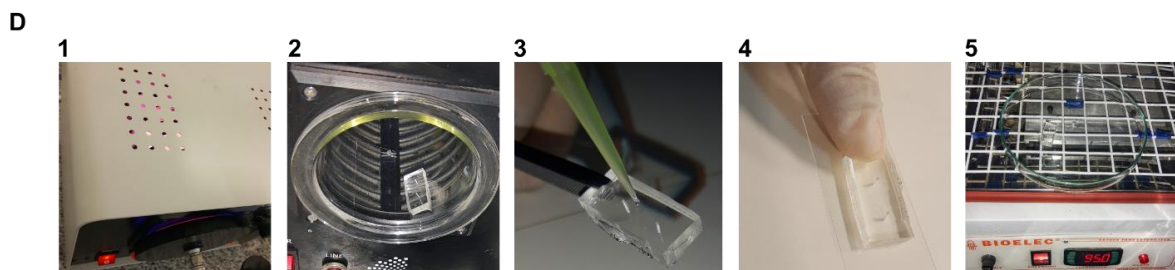

**Fig. S8. Soft lithography using PDMS. A. Prepare the PDMS.** Mix the base and the curing agent thoroughly in the recommended ratio. Pour the PDMS into the mold, place it in a desiccator and applying vacuum to remove trapped air bubbles. Cure the PDMS at the recommended temperature and peel-off the PDMS replica from the mold. **B. Define the inlet and outlet holes** Remove PDMS around the design with a scalpel and punch holes for tubing using a biopsy puncher. **C. PDMS/coverlip bonding.** Activate the PDMS replica and the cover glass with O<sub>2</sub> plasma. Then place a drop of sterile distilled water on the PDMS slab to improve the bonding process. Assemble the device by gentle manual pressure.

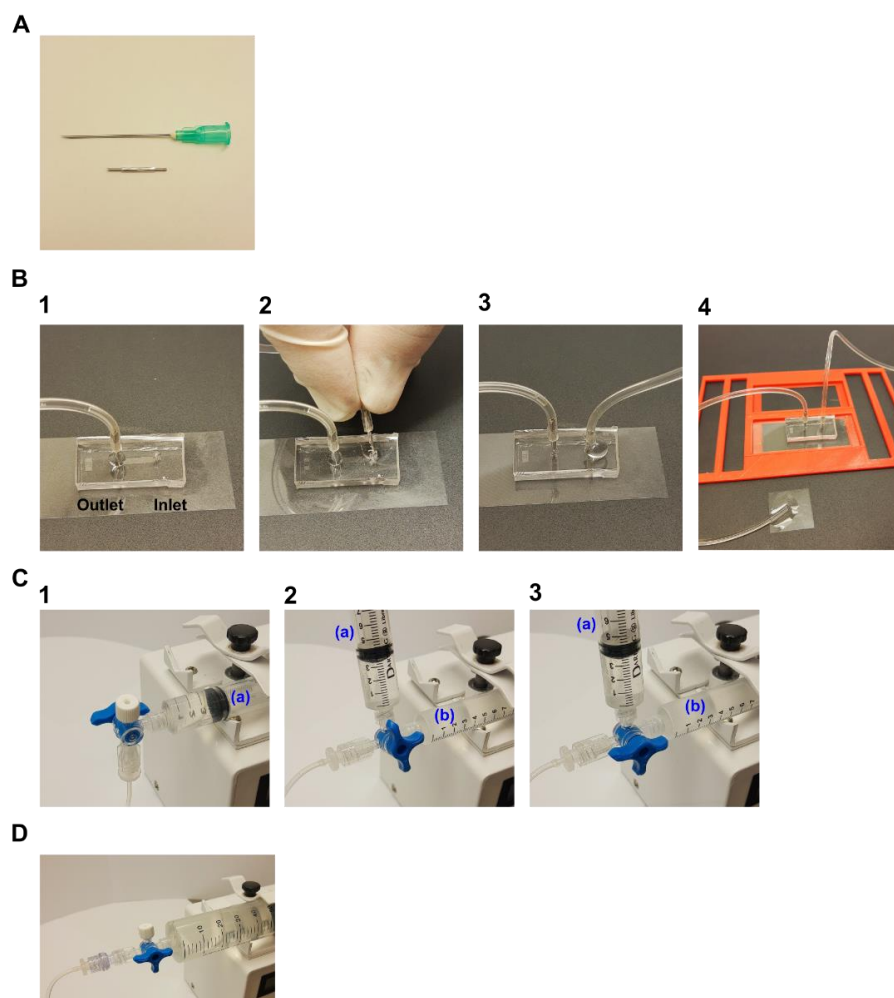

**Fig. S9. Microfluidic Live Microscopy Setup.** **A. Preparation of customized tips.** Use disposable needles with aluminum covers. **B. Tubing connection and flow testing.** Insert the outlet tubing. Moisten the inlet with a few drops of liquid. Insert the inlet tubing. Check for a continuous liquid stream flowing out of the outlet tubing. This confirms a successful setup. (The red colored holder in the figure is a custom 3D-printed design.). **C. Change of syringe (a) to syringe (b).** Close the T-valve, insert the new syringe (b) and place it in the pump, purge bubbles out of syringe (b) into (a). Open the T-valve to connect syringe (b) to the microfluidic chip. **D. Assembly configuration for long-term culturing (3-4 days).** Connect a 60 ml syringe, a one-way valve, a T-valve, and tubing. See details in the text.



**Table S1.** Statistical parameters of three WT RLS distributions.

| Experiment | Cell n° | Median | Mean | Maximum | Minimum | p value vs strain WT-1 | p value vs strain WT-2 | p value vs strain WT-3 |
|------------|---------|--------|------|---------|---------|------------------------|------------------------|------------------------|
| WT-1       | 215     | 16     | 17.2 | 38      | 2       |                        | 0.69                   | 0.74                   |
| WT-2       | 208     | 15.5   | 16.9 | 40      | 3       | 0.69                   |                        | 0.52                   |
| WT-3       | 108     | 16     | 17.4 | 38      | 3       | 0.74                   | 0.52                   |                        |

**Table S2.** Statistical parameters of the *tor1* mutant and WT strain distributions.

| Experiment  | Cell n° | Median | Mean | Maximum | Minimum | p value vs strain <i>tor1</i> |
|-------------|---------|--------|------|---------|---------|-------------------------------|
| WT          | 531     | 16     | 17.1 | 40      | 2       | $< 2.2e^{-16}$                |
| <i>tor1</i> | 252     | 21     | 23.2 | 59      | 4       |                               |

**Table S3.** Statistical parameters of the two *tor1* mutant RLS distributions.

| Experiment    | Cell n° | Median | Mean | Maximum | Minimum | p value vs strain <i>tor1</i> |
|---------------|---------|--------|------|---------|---------|-------------------------------|
| <i>tor1-1</i> | 134     | 21.5   | 23.8 | 59      | 4       | 0.84                          |
| <i>tor1-2</i> | 118     | 21     | 22.3 | 43      | 3       |                               |

**Table S4.** Reported RLS data of haploid budding yeast using microfluidic methods.

| Strain | Culture media | Microfluidic device             | Number of cells | RLS mean     | Reference                           |
|--------|---------------|---------------------------------|-----------------|--------------|-------------------------------------|
| BY4741 | SC            | Three bar jails                 | 106             | 25.8 +/- 0,6 | (Gao et al., 2020)                  |
| BY4741 | SC            | Opposing L shaped pillars traps | 111             | 25.6 +/-0,7  | (Gao et al., 2020)                  |
| BY4741 | SC            | Microchannels                   | 121             | 24.9 +/-0,6  | (Gao et al., 2020; Li et al., 2017) |
| BY4741 | SC            | Micropads                       | 117             | 22.5 +/-0,5  | (Gao et al., 2020)                  |
| BY4742 | YPD           | Three bar jails                 | 100             | 29.3         | (Liu et al., 2015)                  |
| S288C  | YPD           | Micropads                       | 76              | 25.0         | (Lee et al., 2012)                  |
| BY4741 | SD            | Three bar jails                 | -               | 19.2         | (Durán et al., 2020)                |
| BY4741 | YPD           | Micropads                       | 40              | 23.6         | (Zhang et al., 2012)                |
| BY4742 | YPD           | Micropads                       | 61              | 26           | (Zhang et al., 2012)                |
| BY4741 | SC            | Microcavities                   | 99              | 25.3 +/- 1   | (Fehrmann et al., 2013)             |
| S288C  | SC            | V-shape traps                   | 422             | 22.4         | (Crane et al., 2014)                |
| BY4741 | YPD           | Opposing L shaped pillars traps | 458             | 24.2         | (Jo et al., 2015)                   |

**Table S5.** Equipment

| Equipment                   | Source                      | Identifier         |
|-----------------------------|-----------------------------|--------------------|
| Spin coater machine         | Speciality Coating Systems  | SCS G3P-8          |
| Precision hot plate         | Electronic Micro Systems    | EMD-1000-1         |
| Mask aligner                | EVG Mask Alignment Systems  | EVG620             |
| Surface profilometry system | KLA-TENCOR                  | AlphaStep KLA D120 |
| Incubation oven             | Bioelec                     | RG 41•1            |
| Orbital shaker              | Thermo Electron Corporation | SHKE435HP          |
| Sonic dismembrator          | Thermo Fisher Scientific    | FB50220            |
| Ultraviolet Crosslinker     | Analytik Jena               | CL-100             |

|                      |                          |               |
|----------------------|--------------------------|---------------|
| Plasma cleaner       | Harrick Plasma           | PDC32G-M-03   |
| Laminar flow cabinet | Thermo Scientific, BSL-1 | Heraguard ECO |
| Microscope           | Olympus                  | IX-81         |
| Syringe pump         | Apema                    | PC11UBT       |

**Table S6.** Reagents and materials.

| Reagents and materials                                 | Source                    | Identifier             |
|--------------------------------------------------------|---------------------------|------------------------|
| Silicon Wafer                                          | University Wafer          | #452                   |
| Glass chrome mask                                      | HTA Photomask             | This study             |
| Photoresist SU-8 2005                                  | Kayaku Advanced Materials | SU-8 2005              |
| Ethyl lactate                                          | Sigma-Aldrich             | W244007                |
| 2-propanol                                             | Sigma-Aldrich             | 34863                  |
| Sylgard 184 silicone elastomer kit                     | Dow                       | 2646340                |
| Cover glass                                            | Marienfeld                | 0101242                |
| Biopsy punch with plunger                              | Ted Pella Miltex®         | 15110-10               |
| Filters, 0,22 µm pore size                             | Microclar                 | N02025WPH              |
| Masterflex® One-way luer check valves                  | Avantor                   | MFLX30505-92           |
| Masterflex® Transfer Tubing, Tygon®                    | Avantor                   | MFLX06407-70           |
| Masterflex® Adapter fittings, Female Luer to Hose Barb | Avantor                   | MFLX45508-00           |
| Bovine Serum Albumin (BSA)                             | Sigma-Aldrich             | A7906                  |
| Oxi 5 (disinfectant based on peracetic acid)           | Suttley                   | Oxi 5                  |
| Luer lock disposable sterile syringes                  | Euromix                   | Jer60LLEUR, Jer10LLEUR |
| Disposable Needles                                     | Bremen                    | 21G                    |
| Fluorescent Brightener 28 (Calcofluor white)           | Sigma Aldrich             | F3543                  |

**Table S7.** Haploid strains employed in this work.

| Strain      | Background | Relevant genotype    | Source          |
|-------------|------------|----------------------|-----------------|
| WT          | BY4742     | Wild type            | EUROSCARF Y1000 |
| <i>tor1</i> | BY4742     | <i>tor1Δ::kanMX4</i> | This study      |

**Table S8.** Primers used in this study.

| Primer       | Sequence                      |
|--------------|-------------------------------|
| TOR1-F       | AAT CCT AAT TTC TTG CTC AAT C |
| TOR1-R       | AAT GGA CTG ATA TTG CCA ATA C |
| KanCheck-F   | TGA TTT TGA TGA CGA GCG TAA T |
| KanCheck-Rev | CTG CAG CGA GGA GCC GTA AT    |

**Table S9.** YPD-agar.

| Reagent       | Source        | Concentration (g L <sup>-1</sup> ) | Catalog n° |
|---------------|---------------|------------------------------------|------------|
| Glucose       | Sigma Aldrich | 20                                 | G5767      |
| Yeast extract | Thermo Fisher | 10                                 | 212750     |
| Peptone       | Thermo Fisher | 20                                 | 211677     |
| Agar          | Merk          | 20                                 | 05040      |

**Table S10.** SC medium

| Reagent             | Source        | Concentration (g/L) | Catalog n° |
|---------------------|---------------|---------------------|------------|
| Glucose             | Sigma Aldrich | 20                  | G5767      |
| Yeast nitrogen base | Sunrise       | 1.7                 | 1500       |
| Ammonium sulfate    | Cicarelli     | 5                   | 764214     |
| Dropout mix         | Sunrise       | 0.6                 | 1002       |
| Histidine           | Sigma Aldrich | 0.02                | H6034      |
| Tryptophan          | Sigma Aldrich | 0.05                | T8941      |
| Leucine             | Sigma Aldrich | 0.1                 | L8000      |
| Uracil              | Sigma Aldrich | 0.02                | U1128      |

|                 |               |       |       |
|-----------------|---------------|-------|-------|
| Adenine         | Sigma Aldrich | 0.04  | A9126 |
| Ampicillin      | Sigma Aldrich | 0.1   | A9518 |
| Chloramphenicol | Sigma Aldrich | 0.034 | C0378 |
| Kanamycin       | Sigma Aldrich | 0.05  | 60615 |

**Table S11.** Material sterilization.

| <b>Material</b>                            | <b>Sterilization process</b>                                                     |
|--------------------------------------------|----------------------------------------------------------------------------------|
| BSA 1%                                     | Filtration with nitrocellulose membrane filters (0.22 $\mu\text{m}$ , pore size) |
| SC medium                                  | Filtration with nitrocellulose membrane filters (0.22 $\mu\text{m}$ , pore size) |
| Oxi 5 0.5%                                 | Filtration with nitrocellulose membrane filters (0.22 $\mu\text{m}$ , pore size) |
| Antibiotics                                | Filtration with nitrocellulose membrane filters (0.22 $\mu\text{m}$ , pore size) |
| Tubings                                    | 4,500 $\text{Jm}^{-2}$ UV light dosage plus perfusion of Oxi 0.5%                |
| Adapter fittings, Female Luer to Hose Barb | Autoclave plus 4,500 $\text{Jm}^{-2}$ UV light dosage plus perfusion of Oxi 0.5% |
| Gloves and paper                           | 4,500 $\text{Jm}^{-2}$ UV light dosage                                           |
| Customized aluminum-covered tips           | 4,500 $\text{Jm}^{-2}$ UV light dosage                                           |

**Table S12.** Data files and scripts generated in this study.Available at <https://github.com/EstradaLab-BiophotonicsGroup/RLSMicrofab/>

| File                              | Description                                                                                                                                                        | Figure          |
|-----------------------------------|--------------------------------------------------------------------------------------------------------------------------------------------------------------------|-----------------|
| Trapped_cells_clasification.csv   | Numbers of downstream budding, upstream budding, and censored cells in Chips 1 (n = 1,939 cells) and 2 (n = 1,978 cells)                                           | 2               |
| Trapping_and_clogging.csv         | % of occupied traps and % of clogged traps at 20h in Chips 1 and 2                                                                                                 | 3               |
| Clogging_time_course.csv          | Chip1 traps clogging time course                                                                                                                                   | 3               |
| RLS_WT.csv                        | Number of daughter cells per mother cell of a WT strain (n = 3 experiments, n = 531 cells)                                                                         | 4, 5, 7, S4, S5 |
| Cell_cycle_time.csv               | Cell cycle times during the complete lifespan of 215 trapped WT cells                                                                                              | 4               |
| Chip_loading.csv                  | % of occupied traps during chip loading. At least 110 traps were imaged per zone (P).                                                                              | 5               |
| Generations_bud_scars_chip.csv    | Number of bud scars (generations) per cell of a WT strain mid-log phase culture loaded into the chip at the beginning of the RLS experiment (t = 0, n = 338 cells) | 5               |
| 5D – Medians File.csv             | Distribution of medians generated by bootstrapping using scars analysis.py                                                                                         | 5               |
| Scars Analysis.py                 | Script used for bootstrapping                                                                                                                                      | 5               |
| Generations_bud_scars_flask.csv   | Number of bud scars (generations) per cell of a WT of mid-log phase culture, before loading (n = 338 cells).                                                       | S6              |
| Generations_of_censored_cells.csv | Number of daughter cells per censored mother cell (n = 43)                                                                                                         | 6               |
| Simulated_RLS.csv                 | Simulated number of daughter cells per mother cell in three scenarios described in Figure 6.                                                                       | 6               |
| Simulations.py                    | Script used to generate a distribution of daughter cells using the Weibull survival function                                                                       | 6               |
| RLS_tor1.csv                      | Numbers of daughter cells per mother cell of a <i>tor1</i> mutant strain (n = 2 experiments, n = 252 cells)                                                        | S7, 7           |

## References

- Crane, M. M., Clark, I. B. N., Bakker, E., Smith, S. and Swain, P. S.** (2014). A microfluidic system for studying ageing and dynamic single-cell responses in budding yeast. *PLoS One* **9**, e100042.
- Durán, D. C., Hernández, C. A., Suesca, E., Acevedo, R., Acosta, I. M., Forero, D. A., Rozo, F. E. and Pedraza, J. M.** (2020). Slipstreaming Mother Machine: A Microfluidic Device for Single-Cell Dynamic Imaging of Yeast. *Micromachines (Basel)* **12**,.
- Fehrmann, S., Paoletti, C., Goulev, Y., Ungureanu, A., Aguilaniu, H. and Charvin, G.** (2013). Aging yeast cells undergo a sharp entry into senescence unrelated to the loss of mitochondrial membrane potential. *Cell Rep.* **5**, 1589–1599.
- Gao, Z., Xu, J., Chen, K., Wang, S., Ouyang, Q. and Luo, C.** (2020). Comparative analysis of yeast replicative lifespan in different trapping structures using an integrated microfluidic system. *Adv. Mater. Technol.* **5**, 2000655.
- Jo, M. C., Liu, W., Gu, L., Dang, W. and Qin, L.** (2015). High-throughput analysis of yeast replicative aging using a microfluidic system. *Proc. Natl. Acad. Sci. U. S. A.* **112**, 9364–9369.
- Lee, S. S., Avalos Vizcarra, I., Huberts, D. H. E. W., Lee, L. P. and Heinemann, M.** (2012). Whole lifespan microscopic observation of budding yeast aging through a microfluidic dissection platform. *Proc. Natl. Acad. Sci. U. S. A.* **109**, 4916–4920.
- Li, Y., Jin, M., O’Laughlin, R., Bittihn, P., Tsimring, L. S., Pillus, L., Hasty, J. and Hao, N.** (2017). Multigenerational silencing dynamics control cell aging. *Proc. Natl. Acad. Sci. U. S. A.* **114**, 11253–11258.
- Liu, P., Young, T. Z. and Acar, M.** (2015). Yeast Replicator: A High-Throughput Multiplexed Microfluidics Platform for Automated Measurements of Single-Cell Aging. *Cell Rep.* **13**, 634–644.
- Zhang, Y., Luo, C., Zou, K., Xie, Z., Brandman, O., Ouyang, Q. and Li, H.** (2012). Single cell analysis of yeast replicative aging using a new generation of microfluidic device. *PLoS One* **7**, e48275.
